# Supplementary material for: Analysis of single nucleotide polymorphisms of the metabotropic glutamate receptors in a transgender population
Source: PubMed Central journal article supplement (PMC11196815; doi:10.3389/fendo.2024.1382861), 2024-06-11
Supplement: DataSheet_1.pdf [file DataSheet_1.pdf]

**Supplemental Table 1**

| <b>ID</b> | <b>Group</b> | <b>Age first visit</b> | <b>Place of birth</b> | <b>Ethnicity</b> | <b>First symptoms</b> |
|-----------|--------------|------------------------|-----------------------|------------------|-----------------------|
| TW_038    | TW           | 35.01                  | Spain                 | Caucasian        | Early onset           |
| TW_040    | TW           | 40.04                  | Spain                 | Caucasian        | Early onset           |
| TW_044    | TW           | 20.02                  | Spain                 | Caucasian        | Early onset           |
| TW_055    | TW           | 30.11                  | Spain                 | Caucasian        | Early onset           |
| TW_056    | TW           | 19.04                  | Spain                 | Caucasian        | Early onset           |
| TW_057    | TW           | 18.07                  | Spain                 | Caucasian        | --                    |
| TW_058    | TW           | 29.09                  | Spain                 | Caucasian        | Early onset           |
| TW_061    | TW           | 23.03                  | Spain                 | Caucasian        | Early onset           |
| TW_062    | TW           | 46.04                  | Spain                 | Caucasian        | --                    |
| TW_067    | TW           | 45.07                  | Spain                 | Caucasian        | --                    |
| TW_078    | TW           | 36.10                  | Spain                 | Caucasian        | Early onset           |
| TW_079    | TW           | 34.06                  | Spain                 | Caucasian        | Early onset           |
| TW_081    | TW           | 30.02                  | Spain                 | Caucasian        | Early onset           |
| TW_086    | TW           | 27.02                  | Spain                 | Caucasian        | Early onset           |
| TW_091    | TW           | 25.11                  | Spain                 | Caucasian        | Early onset           |
| TW_094    | TW           | 34.04                  | Spain                 | Caucasian        | Early onset           |
| TW_096    | TW           | 40.07                  | Spain                 | Caucasian        | Early onset           |
| TW_097    | TW           | 38.02                  | Spain                 | Caucasian        | Early onset           |
| TW_099    | TW           | 36.05                  | Spain                 | Caucasian        | Early onset           |
| TW_101    | TW           | 46.01                  | Spain                 | Caucasian        | Early onset           |
| TW_102    | TW           | 20.12                  | Spain                 | Caucasian        | Early onset           |
| TW_103    | TW           | 52.08                  | Spain                 | Caucasian        | Early onset           |
| TW_104    | TW           | 27.01                  | Spain                 | Caucasian        | Early onset           |
| TW_105    | TW           | 29.03                  | Spain                 | Caucasian        | Early onset           |
| TW_106    | TW           | 38.10                  | Spain                 | Caucasian        | Early onset           |
| TW_113    | TW           | 32.12                  | Spain                 | Caucasian        | --                    |
| TW_116    | TW           | 35.03                  | Spain                 | Caucasian        | Early onset           |
| TW_118    | TW           | 23.05                  | Spain                 | Caucasian        | Early onset           |
| TW_119    | TW           | 35.01                  | Spain                 | Caucasian        | Early onset           |
| TW_122    | TW           | 26.07                  | Spain                 | Caucasian        | Early onset           |
| TW_126    | TW           | 20.11                  | Spain                 | Caucasian        | Early onset           |
| TW_127    | TW           | 20.03                  | Spain                 | Caucasian        | Early onset           |
| TW_128    | TW           | 31.10                  | Spain                 | Caucasian        | --                    |
| TW_129    | TW           | 40.04                  | Spain                 | Caucasian        | Early onset           |
| TW_130    | TW           | 32.09                  | Spain                 | Caucasian        | Late onset            |
| TW_165    | TW           | 18.05                  | Spain                 | Caucasian        | --                    |
| TW_166    | TW           | 22.05                  | Spain                 | Caucasian        | Early onset           |
| TW_169    | TW           | 27.10                  | Spain                 | Caucasian        | --                    |
| TW_172    | TW           | 40.11                  | Spain                 | Caucasian        | Early onset           |
| TW_173    | TW           | 20.04                  | Spain                 | Caucasian        | --                    |
| TW_185    | TW           | 29.02                  | Spain                 | Caucasian        | Early onset           |
| TW_190    | TW           | 47.01                  | Spain                 | Caucasian        | Early onset           |
| TW_200    | TW           | 38.09                  | Spain                 | Caucasian        | Early onset           |

|        |    |       |       |           |             |
|--------|----|-------|-------|-----------|-------------|
| TW_207 | TW | 25.07 | Spain | Caucasian | Early onset |
| TW_227 | TW | 18.06 | Spain | Caucasian | Early onset |
| TW_232 | TW | 31.02 | Spain | Caucasian | Early onset |
| TW_236 | TW | 26.01 | Spain | Caucasian | Early onset |
| TM_030 | TM | 26.09 | Spain | Caucasian | Early onset |
| TM_041 | TM | 18.05 | Spain | Caucasian | Early onset |
| TM_043 | TM | 20.06 | Spain | Caucasian | Early onset |
| TM_045 | TM | 42.01 | Spain | Caucasian | Early onset |
| TM_046 | TM | 34.05 | Spain | Caucasian | Early onset |
| TM_051 | TM | 24.07 | Spain | Caucasian | Early onset |
| TM_063 | TM | 30.12 | Spain | Caucasian | Early onset |
| TM_064 | TM | 20.01 | Spain | Caucasian | Early onset |
| TM_069 | TM | 19.07 | Spain | Caucasian | Early onset |
| TM_071 | TM | 27.03 | Spain | Caucasian | Early onset |
| TM_073 | TM | 40.09 | Spain | Caucasian | Early onset |
| TM_082 | TM | 21.01 | Spain | Caucasian | Early onset |
| TM_088 | TM | 24.07 | Spain | Caucasian | Early onset |
| TM_092 | TM | 21.09 | Spain | Caucasian | Early onset |
| TM_093 | TM | 24.03 | Spain | Caucasian | Early onset |
| TM_107 | TM | 20.05 | Spain | Caucasian | Early onset |
| TM_110 | TM | 32.11 | Spain | Caucasian | --          |
| TM_111 | TM | 18.04 | Spain | Caucasian | --          |
| TM_112 | TM | 24.09 | Spain | Caucasian | --          |
| TM_115 | TM | 27.12 | Spain | Caucasian | --          |
| TM_120 | TM | 21.10 | Spain | Caucasian | Early onset |
| TM_121 | TM | 36.02 | Spain | Caucasian | Early onset |
| TM_136 | TM | 23.01 | Spain | Caucasian | Early onset |
| TM_140 | TM | 23.05 | Spain | Caucasian | Early onset |
| TM_141 | TM | 22.01 | Spain | Caucasian | Early onset |
| TM_142 | TM | 27.11 | Spain | Caucasian | Early onset |
| TM_143 | TM | 26.08 | Spain | Caucasian | Early onset |
| TM_144 | TM | 41.04 | Spain | Caucasian | Early onset |
| TM_146 | TM | 27.02 | Spain | Caucasian | Early onset |
| TM_156 | TM | 25.06 | Spain | Caucasian | Early onset |
| TM_163 | TM | 30.10 | Spain | Caucasian | Early onset |
| TM_171 | TM | 28.08 | Spain | Caucasian | Early onset |
| TM_175 | TM | 31.05 | Spain | Caucasian | Early onset |
| TM_176 | TM | 21.02 | Spain | Caucasian | Early onset |
| TM_177 | TM | 22.10 | Spain | Caucasian | Early onset |
| TM_179 | TM | 23.11 | Spain | Caucasian | Early onset |
| TM_180 | TM | 36.03 | Spain | Caucasian | Early onset |
| TM_182 | TM | 25.01 | Spain | Caucasian | Early onset |
| TM_187 | TM | 31.05 | Spain | Caucasian | Early onset |
| TM_194 | TM | 31.09 | Spain | Caucasian | Early onset |
| TM_197 | TM | 48.12 | Spain | Caucasian | Early onset |
| TM_209 | TM | 23.05 | Spain | Caucasian | Early onset |

|          |    |       |       |           |             |
|----------|----|-------|-------|-----------|-------------|
| TM_211   | TM | 22.09 | Spain | Caucasian | Early onset |
| TM_216   | TM | 21.07 | Spain | Caucasian | Early onset |
| TM_217   | TM | 20.04 | Spain | Caucasian | Early onset |
| TM_239   | TM | 22.10 | Spain | Caucasian | Early onset |
| TM_250   | TM | 18.03 | Spain | Caucasian | Early onset |
| CM_1_19  | CM | 35.12 | Spain | Caucasian | --          |
| CM_10_19 | CM | 40.07 | Spain | Caucasian | --          |
| CM_12_19 | CM | 20.01 | Spain | Caucasian | --          |
| CM_13_19 | CM | 30.07 | Spain | Caucasian | --          |
| CM_14_19 | CM | 19.03 | Spain | Caucasian | --          |
| CM_15_19 | CM | 18.07 | Spain | Caucasian | --          |
| CM_17_19 | CM | 29.05 | Spain | Caucasian | --          |
| CM_18_19 | CM | 23.09 | Spain | Caucasian | --          |
| CM_19_19 | CM | 48.02 | Spain | Caucasian | --          |
| CM_2_19  | CM | 45.04 | Spain | Caucasian | --          |
| CM_20_19 | CM | 36.12 | Spain | Caucasian | --          |
| CM_21_19 | CM | 34.09 | Spain | Caucasian | --          |
| CM_22_19 | CM | 30.05 | Spain | Caucasian | --          |
| CM_23_19 | CM | 27.07 | Spain | Caucasian | --          |
| CM_24_19 | CM | 25.01 | Spain | Caucasian | --          |
| CM_26_19 | CM | 34.04 | Spain | Caucasian | --          |
| CM_27_19 | CM | 40.09 | Spain | Caucasian | --          |
| CM_28_19 | CM | 38.01 | Spain | Caucasian | --          |
| CM_29_19 | CM | 36.09 | Spain | Caucasian | --          |
| CM_3_19  | CM | 46.10 | Spain | Caucasian | --          |
| CM_30_19 | CM | 20.09 | Spain | Caucasian | --          |
| CM_31_19 | CM | 52.03 | Spain | Caucasian | --          |
| CM_32_19 | CM | 32.09 | Spain | Caucasian | --          |
| CM_33_19 | CM | 29.01 | Spain | Caucasian | --          |
| CM_34_19 | CM | 38.06 | Spain | Caucasian | --          |
| CM_35_19 | CM | 32.01 | Spain | Caucasian | --          |
| CM_36_19 | CM | 35.10 | Spain | Caucasian | --          |
| CM_37_19 | CM | 23.04 | Spain | Caucasian | --          |
| CM_38_19 | CM | 35.09 | Spain | Caucasian | --          |
| CM_39_19 | CM | 26.05 | Spain | Caucasian | --          |
| CM_4_19  | CM | 21.03 | Spain | Caucasian | --          |
| CM_40_19 | CM | 20.12 | Spain | Caucasian | --          |
| CM_41_19 | CM | 31.10 | Spain | Caucasian | --          |
| CM_5_19  | CM | 40.04 | Spain | Caucasian | --          |
| CM_52_19 | CM | 38.08 | Spain | Caucasian | --          |
| CM_54_19 | CM | 18.04 | Spain | Caucasian | --          |
| CM_55_19 | CM | 22.07 | Spain | Caucasian | --          |
| CM_56_19 | CM | 27.04 | Spain | Caucasian | --          |
| CM_57_19 | CM | 43.01 | Spain | Caucasian | --          |
| CM_58_19 | CM | 20.06 | Spain | Caucasian | --          |
| CM_59_19 | CM | 29.08 | Spain | Caucasian | --          |

|          |    |       |       |           |    |
|----------|----|-------|-------|-----------|----|
| CM_60_19 | CM | 47.11 | Spain | Caucasian | -- |
| CM_7_19  | CM | 38.06 | Spain | Caucasian | -- |
| CM_9_19  | CM | 25.12 | Spain | Caucasian | -- |
| CW_1_19  | CW | 18.07 | Spain | Caucasian | -- |
| CW_10_19 | CW | 31.11 | Spain | Caucasian | -- |
| CW_12_19 | CW | 26.07 | Spain | Caucasian | -- |
| CW_13_19 | CW | 26.04 | Spain | Caucasian | -- |
| CW_14_19 | CW | 18.12 | Spain | Caucasian | -- |
| CW_15_19 | CW | 20.07 | Spain | Caucasian | -- |
| CW_17_19 | CW | 35.03 | Spain | Caucasian | -- |
| CW_18_19 | CW | 34.06 | Spain | Caucasian | -- |
| CW_19_19 | CW | 24.07 | Spain | Caucasian | -- |
| CW_2_19  | CW | 30.02 | Spain | Caucasian | -- |
| CW_20_19 | CW | 20.09 | Spain | Caucasian | -- |
| CW_21_19 | CW | 19.10 | Spain | Caucasian | -- |
| CW_23_19 | CW | 27.01 | Spain | Caucasian | -- |
| CW_24_19 | CW | 40.04 | Spain | Caucasian | -- |
| CW_25_19 | CW | 21.07 | Spain | Caucasian | -- |
| CW_27_19 | CW | 24.01 | Spain | Caucasian | -- |
| CW_28_19 | CW | 20.02 | Spain | Caucasian | -- |
| CW_29_19 | CW | 24.05 | Spain | Caucasian | -- |
| CW_3_19  | CW | 20.04 | Spain | Caucasian | -- |
| CW_30_19 | CW | 30.01 | Spain | Caucasian | -- |
| CW_31_19 | CW | 24.10 | Spain | Caucasian | -- |
| CW_32_19 | CW | 30.09 | Spain | Caucasian | -- |
| CW_33_19 | CW | 35.03 | Spain | Caucasian | -- |
| CW_34_19 | CW | 21.01 | Spain | Caucasian | -- |
| CW_35_19 | CW | 36.05 | Spain | Caucasian | -- |
| CW_36_19 | CW | 23.12 | Spain | Caucasian | -- |
| CW_37_19 | CW | 23.06 | Spain | Caucasian | -- |
| CW_38_19 | CW | 22.02 | Spain | Caucasian | -- |
| CW_39_19 | CW | 27.01 | Spain | Caucasian | -- |
| CW_4_19  | CW | 26.12 | Spain | Caucasian | -- |
| CW_40_19 | CW | 22.06 | Spain | Caucasian | -- |
| CW_41_19 | CW | 27.11 | Spain | Caucasian | -- |
| CW_5_19  | CW | 25.03 | Spain | Caucasian | -- |
| CW_52_19 | CW | 30.09 | Spain | Caucasian | -- |
| CW_53_19 | CW | 28.03 | Spain | Caucasian | -- |
| CW_55_19 | CW | 31.12 | Spain | Caucasian | -- |
| CW_56_19 | CW | 21.04 | Spain | Caucasian | -- |
| CW_57_19 | CW | 22.08 | Spain | Caucasian | -- |
| CW_58_19 | CW | 23.07 | Spain | Caucasian | -- |
| CW_60_19 | CW | 36.01 | Spain | Caucasian | -- |
| CW_61_19 | CW | 25.10 | Spain | Caucasian | -- |
| CW_62_19 | CW | 25.04 | Spain | Caucasian | -- |
| CW_63_19 | CW | 31.12 | Spain | Caucasian | -- |

|          |    |       |       |           |    |
|----------|----|-------|-------|-----------|----|
| CW_64_19 | CW | 23.09 | Spain | Caucasian | -- |
| CW_65_19 | CW | 23.08 | Spain | Caucasian | -- |
| CW_66_19 | CW | 22.01 | Spain | Caucasian | -- |
| CW_67_19 | CW | 21.05 | Spain | Caucasian | -- |
| CW_68_19 | CW | 20.06 | Spain | Caucasian | -- |
| CW_69_19 | CW | 22.11 | Spain | Caucasian | -- |
| CW_9_19  | CW | 22.04 | Spain | Caucasian | -- |

---
