# Supplementary material for: Analysis of single nucleotide polymorphisms of the metabotropic glutamate receptors in a transgender population
Source: PubMed Central journal article supplement (PMC11196815; doi:10.3389/fendo.2024.1382861), 2024-06-11
Supplement: DataSheet_2.pdf [file DataSheet_2.pdf]

## Supplemental Table 2

Name of the polymorphisms analyzed (SNP-ID), chromosome localization and localization at the metabotropic glutamate receptors. \* Polymorphism with significant differences at level  $P \leq 0.05$ . \*\* Polymorphism with significant differences at level  $P \leq 0.005$ . \*\*\* Polymorphism with significant differences at level  $P \leq 0.0005$

| Metabotropic glutamate receptor name | Chromosome localization | SNP-ID       |
|--------------------------------------|-------------------------|--------------|
| mGluR1                               | 6q24.3                  | rs77376872*  |
|                                      |                         | rs2256998    |
|                                      |                         | rs2247666    |
| mGluR3                               | 7q21.11-q21.12          | rs144397319  |
| mGluR4                               | 6p21.31                 | rs10947475   |
|                                      |                         | rs6904593*   |
|                                      |                         | rs10947476   |
|                                      |                         | rs9380405    |
| mGluR5                               | 11q14.2-q14.3           | rs507187*    |
|                                      |                         | rs603472     |
|                                      |                         | rs12364488*  |
|                                      |                         | rs7924925*   |
|                                      |                         | rs1042602    |
| mGluR7                               | 3p26.1                  | rs9872989*   |
|                                      |                         | rs62237166*  |
|                                      |                         | rs7633040*   |
|                                      |                         | rs73013949   |
|                                      |                         | rs1876615*   |
|                                      |                         | rs62237207** |
|                                      |                         | rs1396402    |
|                                      |                         | rs62237212** |
|                                      |                         | rs13080594   |
|                                      |                         | rs62237216** |
|                                      |                         | rs73809085*  |
| rs62237226**                         |                         |              |
| rs1603876                            |                         |              |

rs579837

rs712776\*

rs12634429\*

Affx-22760456

**rs9838094\*\*\***

rs371097

**rs1818033\*\*\***

rs35154901

rs1516302\*

rs9865821

rs1396409\*

rs11708019

rs4095095\*

rs6775292

rs79706002

rs13071462

rs1901046

rs7623046

rs13068639

rs9860274

rs56002938\*

rs9850541

rs36069901

rs1450100

rs3804945\*

rs17752444

rs55719233

rs6443099

rs12491287

rs1508717

rs9879939

rs79706002

rs2229902

|          |         |               |
|----------|---------|---------------|
| mGluR8   | 7q31.33 | rs28627576    |
|          |         | rs1419441     |
|          |         | rs2097617     |
|          |         | rs11762115*   |
|          |         | rs1419391     |
|          |         | rs7782149**   |
|          |         | rs17867159    |
|          |         | rs75846534    |
|          |         | rs9640842     |
|          |         | rs4141415     |
|          |         | rs10269701    |
|          |         | Affx-29672839 |
|          |         | rs1557643     |
|          |         | rs2027952     |
| rs712701 |         |               |

---
